# Supplementary material for: Rare variants in SLC5A10 are associated with serum 1,5-anhydroglucitol (1,5-AG) in the Atherosclerosis Risk in Communities (ARIC) Study
Source: Sci Rep. 2019 Apr 11;9:5941. doi: 10.1038/s41598-019-42202-0 (PMC6459884; doi:10.1038/s41598-019-42202-0)
Supplement: Supplementary file 1 — Supplementary tables and figures [file 41598_2019_42202_MOESM1_ESM.docx]

**Supplementary tables and figures**

**TITLE:** Rare variants in *SLC5A10* are associated with serum 1,5-anhydroglucitol (1,5-AG) in the Atherosclerosis Risk in Communities (ARIC) Study

**AUTHORS:**

Stephanie J. Loomis1, sloomis5@jhu.edu

Anna Köttgen1,2, anna.koettgen@uniklinik-freiburg.de

Man Li1,3, man.li@hsc.utah.edu

Adrienne Tin1, atin1@jhu.edu

Joesf Coresh1,4, coresh@jhu.edu

Eric Boerwinkle5, eric.boerwinkle@uth.tmc.edu

Richard Gibbs6, agibbs@bcm.edu

Donna Muzny6, donnam@bcm.edu

James Pankow7, panko001@umn.edu

Elizabeth Selvin1, 4, eselvin@jhu.edu

Priya Duggal1*, pduggal@jhu.edu

Elizabeth Selvin and Priya Duggal contributed equally to this work.

1Department of Epidemiology, The Johns Hopkins University Bloomberg School of Public Health, Baltimore MD

2Institute of Genetic Epidemiology, Medical Center and Faculty of Medicine - University of Freiburg, Freiburg, Germany

3Division of Nephrology and Department of Human Genetics, University of Utah, Salt Lake City, Utah

4Welch Center for Prevention, Epidemiology, & Clinical Research, The Johns Hopkins University, Baltimore MD

5Department of Epidemiology, The University of Texas Health Science Center at Houston School of Public Health at Houston, Houston, TX

6Human Genome Sequencing Center, Baylor College of Medicine, Houston, TX

7Division of Epidemiology and Community Health, University of Minnesota, Minneapolis, MN

**CORRESPONDING AUTHOR:**

Priya Duggal

Email: pduggal@jhu.edu

Phone: 410-955-1213

**Supplemental Table S1**. Study population characteristics.a

|  | **European ancestry (N=6,589)** | **African ancestry (N=2,309)** | **Overall (N=8,898)** |
| --- | --- | --- | --- |
| Female | 55% | 63% | 57% |
| Age | 57 (5.6) | 56 (5.7) | 56.7 (5.7) |
| Fructosamine (µmol/L) | 227 (23) | 238 (32) | 230 (26) |
| Glycated albumin (%) | 12.6 (1.6) | 13.6 (2.4) | 12.9 (1.9) |
| 1,5-AG (µg/mL) | 18.9 (5.8) | 17.5 (5.8) | 18.5 (5.8) |
| HbA1c (%) | 5.4 (0.52) | 5.8 (0.86) | 5.5 (0.64) |
| Fasting glucose (mg/dL) | 104 (17) | 109 (26) | 105 (20) |
| ARIC study center |  |  |  |
| Jackson, Mississippi | 0 | 90% | 23% |
| Forsyth Co, North Carolina | 25% | 10% | 21% |
| Washington Co, Maryland | 30% | 0 | 23% |
| Minneapolis suburbs, Minneapolis | 45% | 0 | 33% |

aContinuous variables shown as mean (SD) and categorical variables shown as (%).

**Supplemental Table S2**. Significanta 1,5-AG (µg/mL) T1 gene-based results in European ancestry sample, validated in African ancestry sample.

|  |  | **European ancestry (N=6,589)** | | | | **African ancestry (N=2,309)** | | | | **Meta-analysis** | |
| --- | --- | --- | --- | --- | --- | --- | --- | --- | --- | --- | --- |
| Chr | Gene | P-value | Beta | cMAF | N SNPs | P-value | Beta | cMAF | N SNPs | P-value | Beta (SE) |
| 17 | SLC5A10 | 2.5E-114 | -8.65 (0.38) | 0.017 | 57 | 7.5E-07 | -2.99 (0.60) | 0.019 | 26 | 1.80E-88 | -5.74 (0.29) |
| 17 | FAM83G | 1.3E-14 | -2.67 (0.35) | 0.016 | 53 | 0.25 | 0.47 (0.40) | 0.04 | 35 | 7.19E-05 | -0.81 (0.20) |
| 3 | SI | 6.4E-07 | 1.25 (0.25) | 0.039 | 130 | 0.14 | 0.46 (0.31) | 0.07 | 63 | 2.73E-05 | 0.68 (0.16) |

a.Bonferroni corrected significance threshold = 2.0x10-6 (0.05/(12,504 genes * 2 gene-based tests)).

**Supplemental Table S3**. Significanta 1,5-AG (µg/mL) SKAT gene-based results in European ancestry sample, validated in African ancestry sample.

|  |  | **European ancestry (N=6,589)** | | | **African ancestry (N=2,309)** | | | **Meta-analysis** |
| --- | --- | --- | --- | --- | --- | --- | --- | --- |
| Chr | Gene | P-value | cMAF | N SNPs | P-value | cMAF | N SNPs | P-value |
| 17 | SLC5A10 | 2.8E-55 | 0.038 | 58 | 6.5E-03 | 0.29 | 28 | 7.03E-83 |
| 17 | FAM83G | 2.8E-18 | 0.060 | 56 | 0.60 | 0.34 | 36 | 4.50E-17 |
| 7 | MGAM | 7.5E-09 | 0.087 | 148 | 0.03 | 0.95 | 98 | 6.57E-06 |
| 22 | SLC5A1 | 6.0E-07 | 0.227 | 48 | 0.11 | 0.07 | 15 | 1.27E-07 |

aBonferroni corrected significance threshold= 2.0x10-6 (0.05/(12,504 genes * 2 gene-based tests)).

**Supplemental Table S4.** Significanta 1,5-AG (µg/mL) gene-based SKAT-O results in European ancestry sample restricting variants to MAF<0.05.

| Chr | Gene | P-value | cMAFb | N SNPs |
| --- | --- | --- | --- | --- |
| 17 | SLC5A10 | 5.13E-64 | 0.04 | 58 |
| 17 | FAM83G | 6.24E-17 | 0.06 | 56 |
| 7 | MGAM | 8.20E-07 | 0.09 | 148 |

a. Bonferroni corrected significance threshold = 4.4x10-6 (0.05/11,332 genes).

b.cMAF=cumulative minor allele frequency

**Supplemental Table S5.** Association between chromosome 17 SNPs and diabetes statusa

|  | **European ancestry (N=6,998)** | | | | **African ancestry (N=2,704)** | | | |
| --- | --- | --- | --- | --- | --- | --- | --- | --- |
|  | **Diagnosed diabetes**  **(N=409 cases)** | | **Diagnosed and undiagnosed diabetes**  **(N=760 cases)** | | **Diagnosed diabetes**  **(N=395 cases)** | | **Diagnosed and undiagnosed diabetes**  **(N=644 cases)** | | |
|  | OR (95% CI) | P-value | OR (95% CI) | P-value | OR (95% CI) | P-value | OR (95% CI) | P-value | |
| rs61741107b | 0.85 (0.34, 2.12) | 0.73 | 0.95 (0.49, 1.85) | 0.88 | -- | -- | -- | -- | |
| rs148178887 | 0.34 (0.05, 2.50) | 0.29 | 1.41 (0.63, 3.19) | 0.41 | 1.61 (0.18, 14.55) | 0.67 | 0.85 (0.09, 7.71) | 0.89 | |
| rs117355297 | 1.01 (0.69, 1.47) | 0.98 | 1.03 (0.77, 1.34) | 0.85 | 0.96 (0.33, 2.81) | 0.95 | 1.06 (0.45, 2.51) | 0.90 | |

a. Diagnosed diabetes is defined as self-reported physician diagnosis or use of diabetes medications. Undiagnosed diabetes is defined as fasting glucose ≥126 mg/dL if fasting for ≥8 hours or fasting glucose >200 if not fasting for ≥8 hours).

b.Only two African ancestry individuals had rs61741107 alleles and thus was too colinear with diabetes to produce a regression estimate.

**Supplemental Table S6**. Chromosome 2 significant results in European ancestry individuals, unconditioned and conditioned on top nonsynonymous variants.

|  |  |  |  |  | **Unconditioned** | | **Conditioned on rs961360** | | **Conditioned on rs961360 and rs2305165** | |
| --- | --- | --- | --- | --- | --- | --- | --- | --- | --- | --- |
| SNP | Gene | Position | A1/A2b | Effect AF | Beta (SE) | P-value1 | Beta (SE) | P-value1 | Beta (SE) | P-valuea |
| rs961360 | *R3HDM1* | 136393658 | A/G | 0.15 | -0.80 (0.14) | **7.82E-09** | -- | -- | -- | -- |
| rs2305165 | *R3HDM1* | 136409574 | A/C | 0.08 | -0.85 (0.18) | 1.86E-06 | -0.98 (0.18) | **5.89E-08** | -- | -- |
| rs2304371 | *LCT* | 136561557 | G/A | 0.83 | 0.89 (0.13) | **6.74E-12** | 0.79 (0.20) | 1.2E-04 | 0.58 (0.21) | 0.006 |
| rs3739022 | *LCT* | 136562472 | G/A | 0.10 | -1.07 (0.17) | **1.23E-10** | -1.02 (0.17) | **8.99E-10** | -0.78 (0.22) | 4.4E-04 |
| rs1050115 | *UBXN4* | 136511817 | A/G | 0.15 | -0.80 (0.14) | **5.69E-09** | -0.53 (0.27) | 0.05 | -0.14 (0.28) | 0.61 |
| rs10445686 | *RAB3GAP1* | 135893372 | A/G | 0.13 | -0.79 (0.14) | **3.59E-08** | -0.35 (0.24) | 0.14 | -0.23 (0.24) | 0.33 |

a.Bold indicates exome-wide significance (Bonferroni corrected significance threshold = 4.1x10-7 (0.05/121,052 SNPs)).

b. A2 is effect allele

**Supplemental Figure S1**. Sample exclusions

**Supplemental Figure S2**. Distribution of biomarkers by chromosome 17 variants.a,b


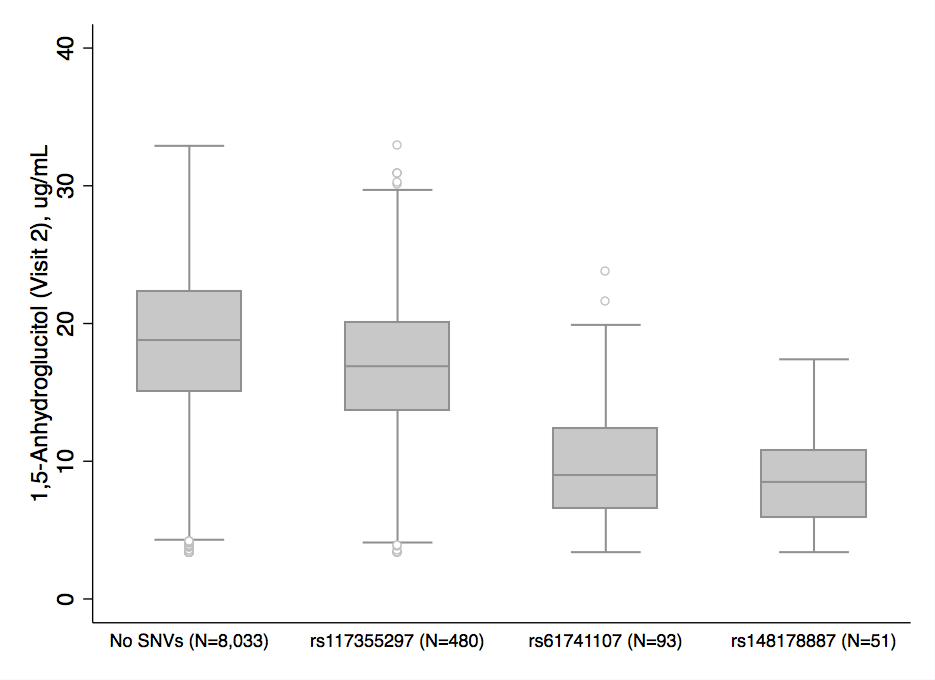

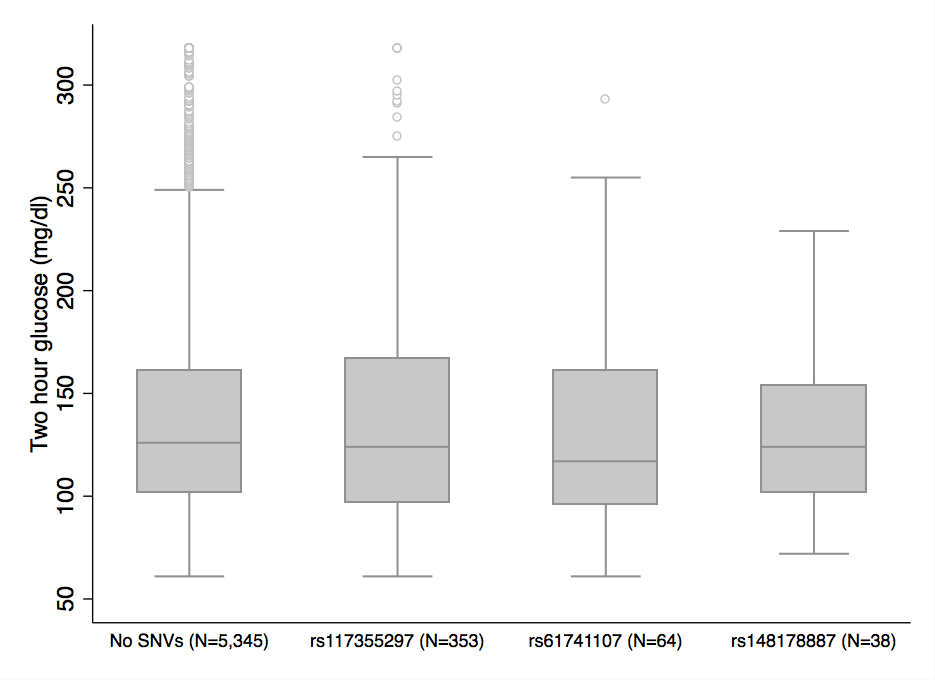


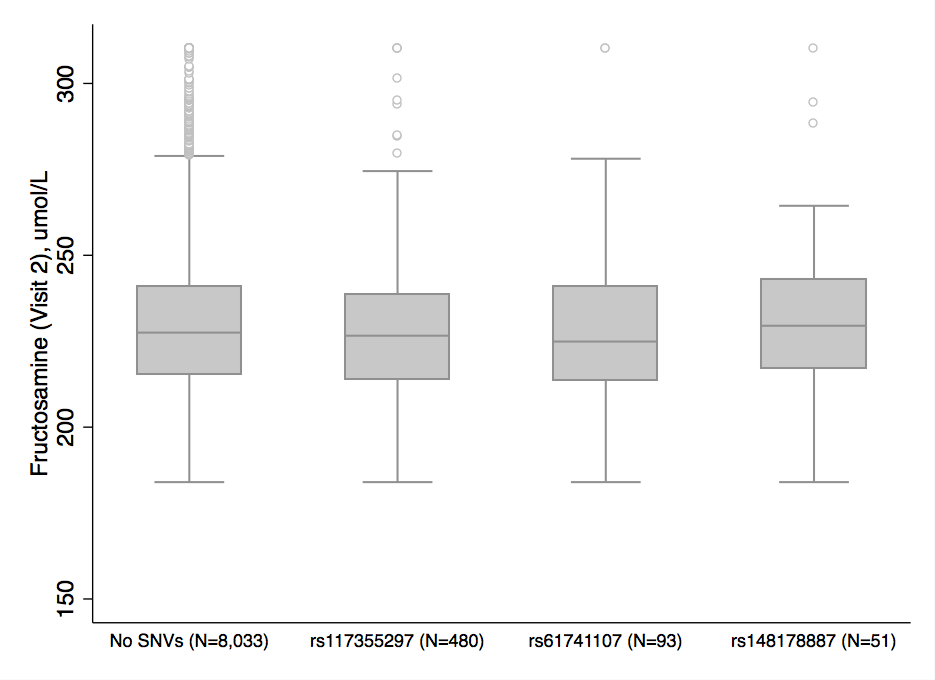

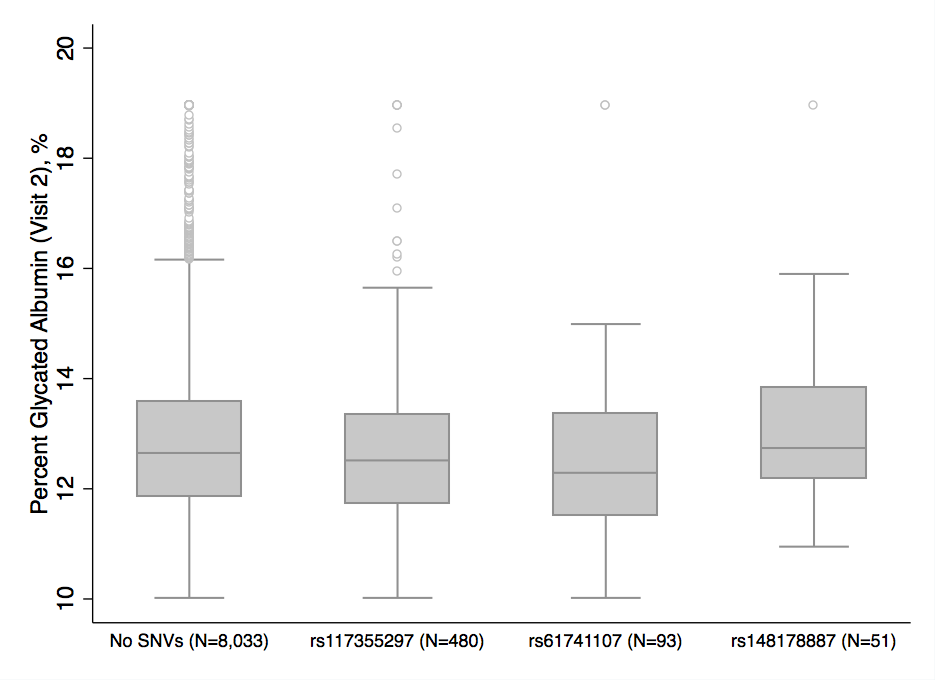

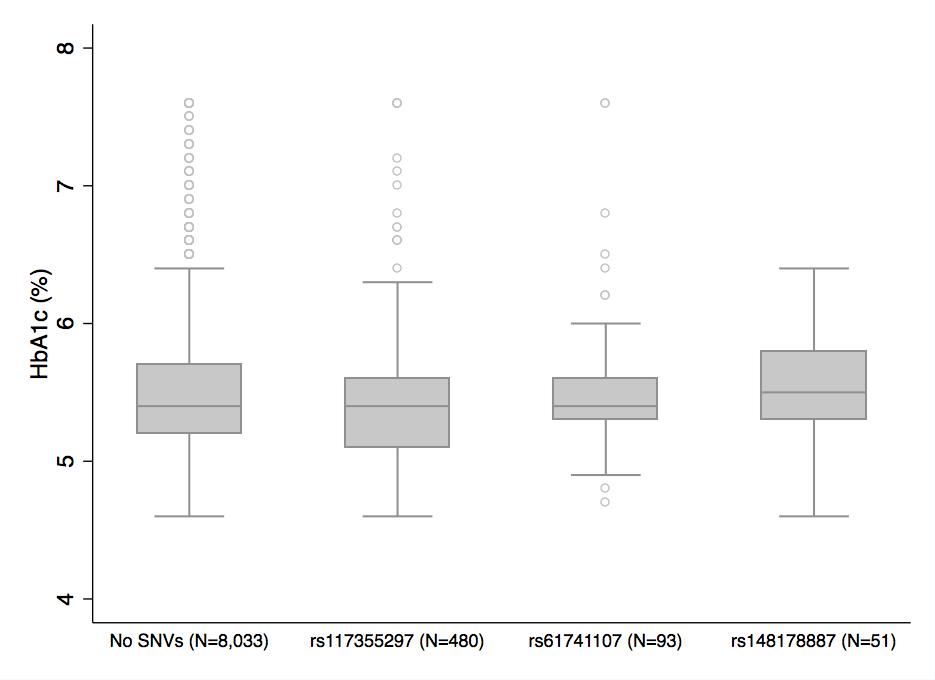

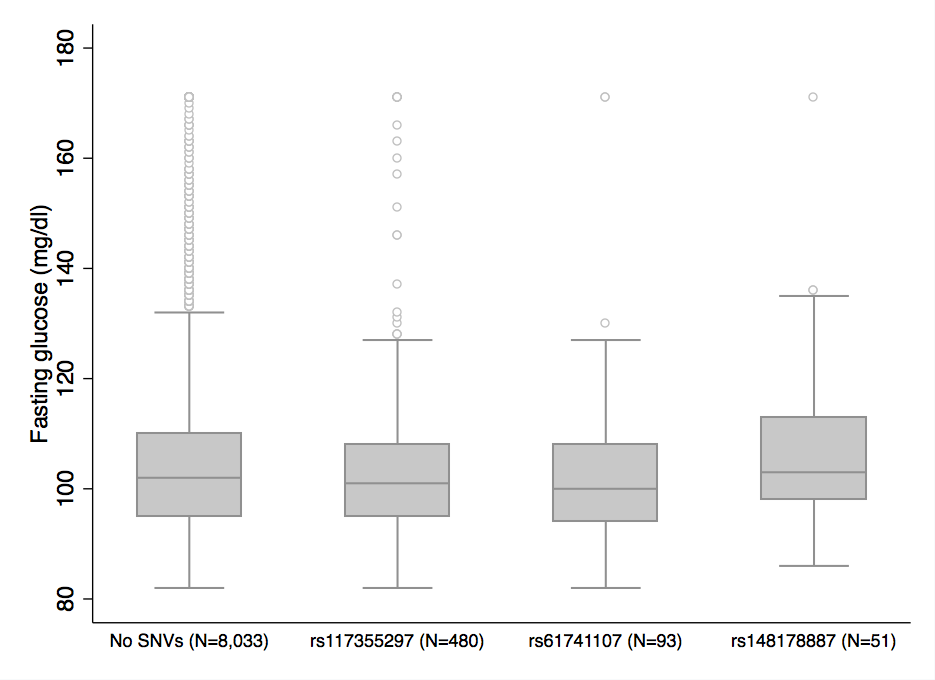


a. Biomarkers are winsorized at 1% and 99%.

b.Two hour glucose was measured at visit 4, other biomarkers were measured at visit 2.

**Supplemental Figure S3.** Distribution of 1,5-AG by chromosome 17 variant genotypes.

**
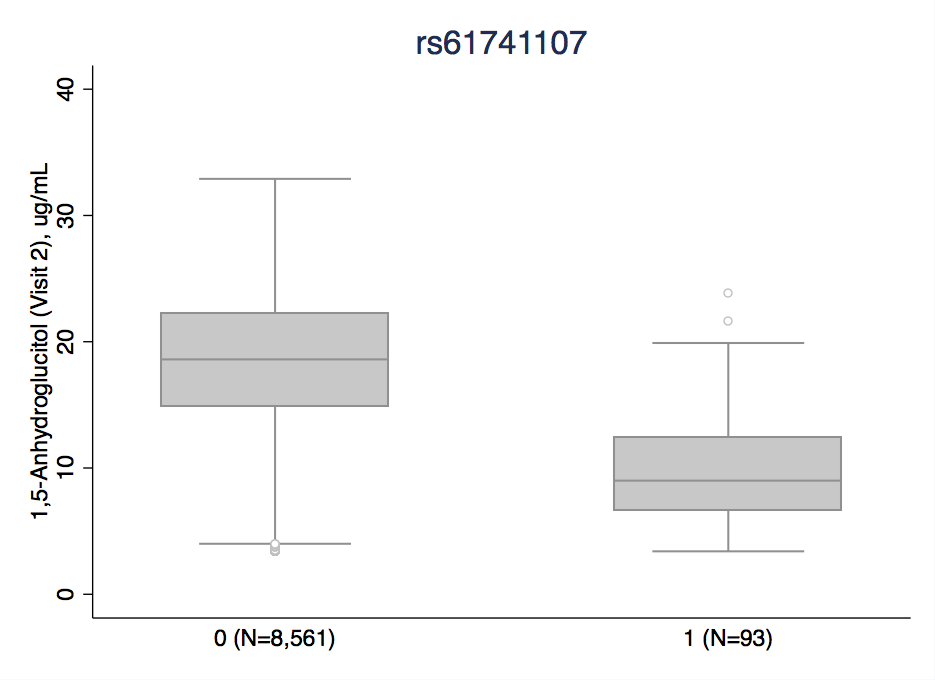

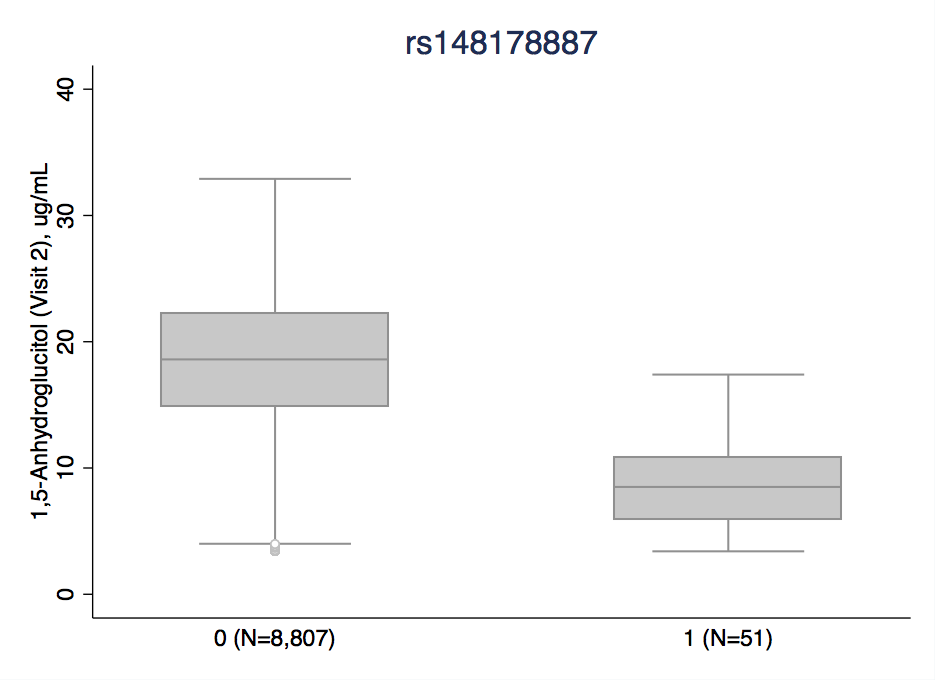

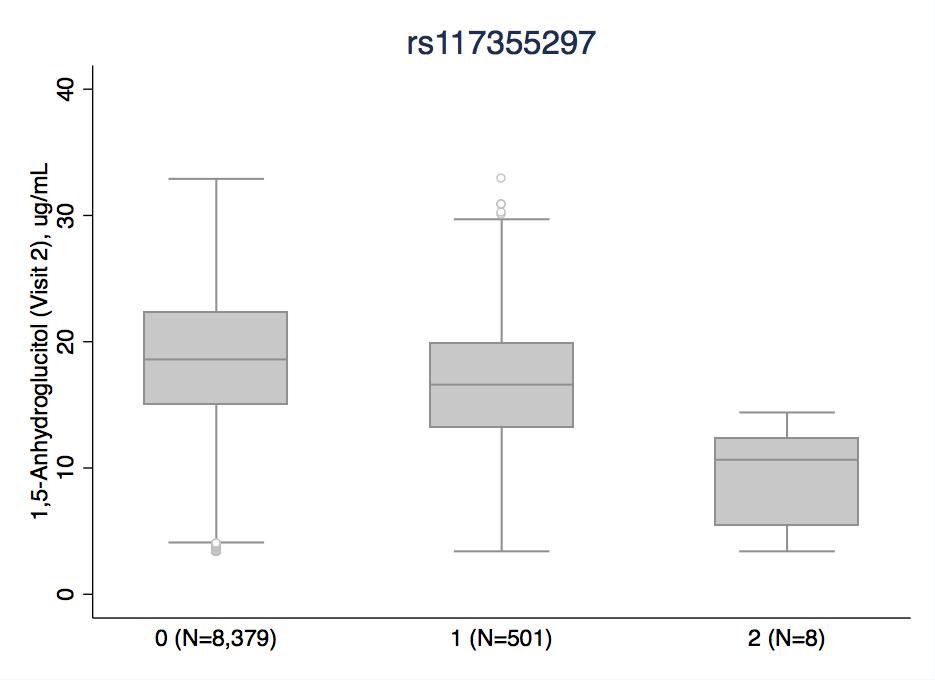
**
